# Supplementary material
Source: PubMed Central journal article supplement (PMC2853982)

# Plasma Adipokines, Bone Mass, and Hip Geometry in Rural Chinese Adolescents

## Supplemental Materials

### Definition of the grade of physical activity

Physical activity was assessed with the short version of the international physical activity questionnaire (IPAQ-short) (<http://www.ipaq.ki.se>), which has been validated in multiple countries, including China. Briefly, the IPAQ-short collects information on 3 types of physical activity (walking, moderate-intensity activities and vigorous -intensity activities) across various physical activity domains using the “last 7 days” as the reference period. Each type of activity was weighted by its metabolic equivalent (MET) level and a score in MET minutes (MET-min) was produced for each subject. “High” physical activity level was defined as (1) vigorous-intensity activity on  $\geq 3$  days and accumulating  $\geq 1500$  MET-min/week”, or (2)  $\geq 7$  days of any combination of walking, moderate-intensity or vigorous-intensity activities, achieving  $\geq 3000$  MET-min/week. “Moderate” physical activity level was defined if one of the following criteria was met; (1)  $\geq 3$  days of vigorous-intensity activity of  $\geq 20$  minutes/day; (2)  $\geq 5$  days of moderate-intensity activity or walking of at least 30 minutes/day; (3)  $\geq 5$  days of any combination of walking, moderate-intensity, or vigorous intensity activities achieving  $\geq 600$  MET-min/week. Those individuals who did not meet criteria for high or moderate physical activity were considered to have a “Low” physical activity level.

**Supplemental Table S1. Association of log-transformed adipokine with bone mineral density in 1250 Chinese adolescents aged 13-21 years, with adjustment of different body compositions.**

| Regression Models                                   | Male                       |                           |                            | Female                  |                         |                         |
|-----------------------------------------------------|----------------------------|---------------------------|----------------------------|-------------------------|-------------------------|-------------------------|
|                                                     | WB-BMD                     | L2L4-BMD                  | TH-BMD                     | WB-BMD                  | L2L4-BMD                | TH-BMD                  |
| <b>Log-transformed adiponectin as the predictor</b> |                            |                           |                            |                         |                         |                         |
| Basic model <sup>a</sup>                            | -0.02+0.00 <sup>****</sup> | -0.05+0.00 <sup>***</sup> | -0.04+0.00 <sup>****</sup> | -0.01+0.00              | -0.02+0.00 <sup>*</sup> | -0.01+0.01              |
| Basic model+LM                                      | -0.02+0.00 <sup>***</sup>  | -0.03+0.01 <sup>***</sup> | -0.03+0.01 <sup>***</sup>  | -0.01+0.00              | -0.01+0.01              | -0.01+0.01              |
| Basic model+BW                                      | -0.02+0.00 <sup>***</sup>  | -0.02+0.00 <sup>**</sup>  | -0.03+0.01 <sup>***</sup>  | -0.01+0.00              | -0.01+0.01              | 0.00+0.00               |
| Basic model+BMI                                     | -0.02+0.00 <sup>***</sup>  | -0.02+0.00 <sup>**</sup>  | -0.02+0.00 <sup>***</sup>  | 0.00+0.00               | -0.01+0.01              | 0.00+0.00               |
| Basic model+LM+FM                                   | -0.02+0.00 <sup>***</sup>  | -0.02+0.01 <sup>**</sup>  | -0.03+0.01 <sup>***</sup>  | 0.00+0.00               | -0.01+0.01              | 0.00+0.01               |
| <b>Log-transformed Leptin as the predictor</b>      |                            |                           |                            |                         |                         |                         |
| Basic model <sup>a</sup>                            | 0.01+0.00 <sup>**</sup>    | 0.00+0.01                 | 0.01+0.01                  | 0.01+0.00 <sup>**</sup> | 0.02+0.01 <sup>*</sup>  | 0.01+0.01 <sup>#</sup>  |
| Basic model+LM                                      | 0.01+0.00 <sup>**</sup>    | 0.00+0.01                 | 0.01+0.00                  | 0.00+0.00               | 0.01+0.01               | 0.00+0.01               |
| Basic model+BW                                      | -0.01+0.00 <sup>**</sup>   | -0.02+0.01 <sup>**</sup>  | -0.02+0.01 <sup>**</sup>   | -0.01+0.01 <sup>*</sup> | -0.01+0.01              | -0.02+0.01 <sup>#</sup> |
| Basic model+BMI                                     | -0.01+0.00 <sup>**</sup>   | -0.01+0.00 <sup>**</sup>  | -0.02+0.01 <sup>*</sup>    | -0.01+0.00 <sup>*</sup> | -0.01+0.01              | -0.02+0.01 <sup>#</sup> |
| Basic model+LM+FM                                   | 0.00+0.00                  | -0.01+0.01                | 0.00+0.01                  | 0.00+0.00               | 0.00+0.01               | -0.01+0.01              |

Beta (parameter estimate) ±standard error was shown in the Table.

LM: whole-body Lean mass; FM: whole-body fat mass; BW: body weight; BMI: body mass index; WB-BMD: whole-body less head bone mineral density (BMD); L2L4-BMD: Lumbar-spine BMD; TH-BMD: total-hip BMD.

<sup>a</sup>Basic model adjusted for age, Tanner stage, height, menarche status (no menarche/menarche at ≤13 years/ menarche at 14 years / menarche at ≥15 years) physical activity, active or passive smoking (yes/no), and student/non-student.

<sup>#</sup>p<0.07; \* p<0.05; \*\* p<0.01, \*\*\* p<0.001, \*\*\*\* p<0.0001

**Supplemental Table S2. Association of log-transformed adiponectin Z-score with bone phenotypes Z-scores in 1250 Chinese adolescents aged 13-21 years, with adjustment of different body compositions.**

| Regression Models                 | WB-BA <sup>b</sup>       | L2L4-BA <sup>b</sup> | TH-BA <sup>b</sup>           | WB-BMC <sup>b</sup>            | L2L4-BMC <sup>b</sup>           | TH-BMC <sup>b</sup>             | CSA <sup>b</sup>         | SM <sup>b</sup>         |
|-----------------------------------|--------------------------|----------------------|------------------------------|--------------------------------|---------------------------------|---------------------------------|--------------------------|-------------------------|
| <b>Males</b>                      |                          |                      |                              |                                |                                 |                                 |                          |                         |
| Basic model <sup>a</sup>          | -0.08+0.03 <sup>**</sup> | -0.01+0.03           | -0.01+0.03                   | <b>-0.04+0.02<sup>**</sup></b> | <b>-0.09+0.02<sup>***</sup></b> | <b>-0.12+0.03<sup>***</sup></b> | -0.10+0.04 <sup>**</sup> | -0.07+0.04 <sup>*</sup> |
| Basic model+LM Z-score            | -0.04+0.02 <sup>*</sup>  | 0.02+0.03            | 0.03+0.03                    | <b>-0.04+0.02<sup>**</sup></b> | <b>-0.07+0.02<sup>***</sup></b> | <b>-0.09+0.03<sup>**</sup></b>  | -0.05+0.03               | -0.03+0.03              |
| Basic model+BW Z-score            | -0.03+0.02               | 0.02+0.03            | 0.02+0.03                    | <b>-0.04+0.02<sup>**</sup></b> | <b>-0.07+0.02<sup>***</sup></b> | <b>-0.09+0.03<sup>**</sup></b>  | -0.05+0.03               | -0.04+0.03              |
| Basic model+BMI Z-score           | -0.03+0.02               | 0.02+0.03            | 0.02+0.03                    | <b>-0.04+0.02<sup>**</sup></b> | <b>-0.07+0.03<sup>***</sup></b> | <b>-0.09+0.03<sup>**</sup></b>  | -0.05+0.03               | -0.04+0.03              |
| Basic model+LM Z-score+FM Z-score | -0.03+0.02               | 0.02+0.03            | 0.03+0.03                    | <b>-0.04+0.02<sup>**</sup></b> | <b>-0.07+0.02<sup>***</sup></b> | <b>-0.08+0.03<sup>**</sup></b>  | -0.05+0.03               | -0.03+0.03              |
| <b>Females</b>                    |                          |                      |                              |                                |                                 |                                 |                          |                         |
| Basic model <sup>a</sup>          | -0.03+0.03               | -0.01+0.04           | <b>0.06+0.04</b>             | -0.01+0.01                     | -0.04+0.03                      | 0.00+0.04                       | -0.04+0.05               | -0.02+0.04              |
| Basic model+LM Z-score            | -0.02+0.03               | 0.00+0.03            | <b>0.07+0.04<sup>*</sup></b> | -0.01+0.01                     | -0.04+0.03                      | 0.02+0.03                       | -0.03+0.04               | -0.02+0.04              |
| Basic model+BW Z-score            | -0.01+0.02               | 0.00+0.03            | <b>0.08+0.04<sup>*</sup></b> | -0.01+0.01                     | -0.04+0.03                      | 0.02+0.03                       | -0.03+0.04               | -0.01+0.04              |
| Basic model+BMI Z-score           | -0.01+0.02               | 0.00+0.03            | <b>0.08+0.04<sup>*</sup></b> | -0.01+0.01                     | -0.04+0.03                      | 0.02+0.04                       | -0.02+0.04               | -0.01+0.04              |
| Basic model+LM Z-score+FM Z-score | 0.00+0.02                | 0.00+0.03            | <b>0.08+0.04<sup>*</sup></b> | -0.02+0.01                     | -0.04+0.03                      | 0.03+0.03                       | -0.02+0.04               | -0.01+0.04              |

Beta (parameter estimate) ±standard error was shown in the Table.

LM: whole-body Lean mass; FM: whole-body fat mass; BW: body weight; BMI: body mass index; WB-BA: whole-body less head bone area (BA); L2L4-BA: Lumbar-spine BA; TH-BA: total-hip BA; WB-BMC: whole-body less head bone mineral content (BMC); L2L4-BMC: Lumbar-spine BMC; TH-BMC: total-hip BMC; CSA: Cross-sectional area; SM: Section modulus

<sup>a</sup>Basic model adjusted for age, Tanner stage, height Z-score, menarche status (no menarche/menarche at ≤13 years/ menarche at 14 years / menarche at ≥15 years), physical activity, active or passive smoking (yes/no), student/non-student, and corresponding bone area (for BMC only).

<sup>b</sup>The corresponding Z-score for each bone phenotype was applied as the outcome.

\* p<0.05, \*\* p<0.01, \*\*\* p<0.001

**Supplemental Table S3. Association of log-transformed letpin Z-score with bone phenotype Z-scores in 1250 Chinese adolescents aged 13-21 years, with adjustment of different body compositions.**

| Regression Models                 | WB-BA <sup>b</sup>               | L2L4-BA <sup>b</sup>             | TH-BA <sup>b</sup>               | WB-BMC <sup>b</sup> | L2L4-BMC <sup>b</sup>         | TH-BMC <sup>b</sup>            | CSA <sup>b</sup>                 | SM <sup>b</sup>                 |
|-----------------------------------|----------------------------------|----------------------------------|----------------------------------|---------------------|-------------------------------|--------------------------------|----------------------------------|---------------------------------|
| <b>Males</b>                      |                                  |                                  |                                  |                     |                               |                                |                                  |                                 |
| Basic model <sup>a</sup>          | 0.10+0.03 <sup>***</sup>         | -0.02+0.03                       | -0.05+0.03                       | 0.01+0.01           | 0.01+0.02                     | 0.04+0.03                      | 0.01+0.04                        | -0.02+0.04                      |
| Basic model+LM Z-score            | 0.09+0.02 <sup>****</sup>        | -0.02+0.02                       | -0.06+0.03 <sup>*</sup>          | 0.01+0.01           | 0.01+0.03                     | 0.03+0.03                      | 0.00+0.03                        | -0.02+0.03                      |
| Basic model+BW Z-score            | <b>-0.09+0.02<sup>****</sup></b> | <b>-0.12+0.03<sup>****</sup></b> | <b>-0.18+0.03<sup>****</sup></b> | -0.01+0.02          | <b>-0.06+0.02<sup>*</sup></b> | <b>-0.09+0.03<sup>**</sup></b> | <b>-0.17+0.04<sup>****</sup></b> | <b>-0.16+0.04<sup>***</sup></b> |
| Basic model+BMI Z-score           | <b>-0.08+0.02<sup>****</sup></b> | <b>-0.12+0.03<sup>****</sup></b> | <b>-0.19+0.04<sup>****</sup></b> | -0.01+0.02          | <b>-0.05+0.02<sup>*</sup></b> | <b>-0.09+0.03<sup>**</sup></b> | <b>-0.17+0.04<sup>****</sup></b> | <b>-0.16+0.04<sup>***</sup></b> |
| Basic model+LM Z-score+FM Z-score | -0.02+0.02                       | -0.03+0.03                       | -0.07+0.03 <sup>*</sup>          | 0.00+0.02           | -0.05+0.03                    | -0.02+0.03                     | -0.04+0.04                       | -0.06+0.04                      |
| <b>Females</b>                    |                                  |                                  |                                  |                     |                               |                                |                                  |                                 |
| Basic model <sup>a</sup>          | 0.21+0.03 <sup>****</sup>        | 0.01+0.04                        | 0.07+0.04                        | -0.02+0.02          | 0.05+0.03                     | 0.08+0.04                      | 0.09+0.05 <sup>*</sup>           | 0.07+0.04                       |
| Basic model+LM Z-score            | 0.13+0.03 <sup>****</sup>        | -0.03+0.04                       | 0.01+0.04                        | -0.02+0.02          | 0.02+0.03                     | 0.01+0.04                      | 0.01+0.05                        | 0.00+0.04                       |
| Basic model+BW Z-score            | <b>-0.07+0.02<sup>***</sup></b>  | <b>-0.11+0.04<sup>**</sup></b>   | <b>-0.11+0.04<sup>**</sup></b>   | -0.03+0.02          | -0.03+0.03                    | <b>-0.11+0.04<sup>*</sup></b>  | <b>-0.13+0.05<sup>*</sup></b>    | <b>-0.13+0.05<sup>**</sup></b>  |
| Basic model+BMI Z-score           | <b>-0.08+0.02<sup>****</sup></b> | <b>-0.11+0.04<sup>**</sup></b>   | <b>-0.11+0.04<sup>**</sup></b>   | -0.02+0.02          | -0.03+0.03                    | <b>-0.12+0.04<sup>**</sup></b> | <b>-0.13+0.05<sup>***</sup></b>  | <b>-0.13+0.05<sup>**</sup></b>  |
| Basic model+LM Z-score+FM Z-score | <b>-0.08+0.02<sup>***</sup></b>  | <b>-0.10+0.04<sup>*</sup></b>    | -0.06+0.04                       | 0.00+0.02           | -0.03+0.04                    | -0.06+0.04                     | -0.08+0.05                       | -0.10+0.05                      |

Beta (parameter estimate) ±standard error was shown in the Table.

LM: whole-body Lean mass; FM: whole-body fat mass; BW: body weight; BMI: body mass index; WB-BA: whole-body less head bone area (BA); L2L4-BA: Lumbar-spine BA; TH-BA: total-hip BA; WB-BMC: whole-body less head bone mineral content (BMC); L2L4-BMC: Lumbar-spine BMC; TH-BMC: total-hip BMC; CSA: Cross-sectional area; SM: Section modulus

<sup>a</sup>Basic model adjusted for age, Tanner stage, height Z-score, menarche status (no menarche/menarche at ≤13 years/ menarche at 14 years / menarche at ≥15 years), physical activity, active or passive smoking (yes/no), student/non-student, and the corresponding bone area (for BMC only).

<sup>b</sup>The corresponding Z-score for each bone phenotype was applied as the outcome.

\* p<0.05; \*\* p<0.01, \*\*\* p<0.001, \*\*\*\* p<0.0001

**Supplemental Table S4. Association of log-transformed adipokine Z-score with bone mineral density Z-score in 1250 Chinese adolescents aged 13–21 years, with adjustment of different body compositions.**

| Regression Models                                           | Male                             |                                  |                                 | Female                        |                         |                               |
|-------------------------------------------------------------|----------------------------------|----------------------------------|---------------------------------|-------------------------------|-------------------------|-------------------------------|
|                                                             | WB-BMD <sup>b</sup>              | L2L4BMD <sup>b</sup>             | TH-BMD <sup>b</sup>             | WB-BMD <sup>b</sup>           | L2L4BMD <sup>b</sup>    | TH-BMD <sup>b</sup>           |
| <b>Log-transformed Adiponectin Z-score as the predictor</b> |                                  |                                  |                                 |                               |                         |                               |
| Basic model <sup>a</sup>                                    | <b>-0.17+0.04<sup>****</sup></b> | <b>-0.16+0.04<sup>****</sup></b> | <b>-0.17+0.04<sup>***</sup></b> | -0.06+0.04                    | -0.07+0.04 <sup>#</sup> | -0.01+0.04                    |
| Basic model+ LM Z-score                                     | <b>-0.12+0.03<sup>***</sup></b>  | <b>-0.13+0.04<sup>***</sup></b>  | <b>-0.13+0.04<sup>***</sup></b> | -0.05+0.04                    | -0.07+0.04              | 0.00+0.04                     |
| Basic model+BW Z-score                                      | <b>-0.11+0.03<sup>***</sup></b>  | <b>-0.13+0.04<sup>***</sup></b>  | <b>-0.13+0.04<sup>***</sup></b> | -0.04+0.04                    | -0.06+0.04              | 0.00+0.04                     |
| Basic model+BMI Z-score                                     | <b>-0.12+0.03<sup>***</sup></b>  | <b>-0.13+0.04<sup>***</sup></b>  | <b>-0.13+0.04<sup>***</sup></b> | -0.04+0.04                    | -0.06+0.04              | 0.00+0.04                     |
| Basic model+LM Z-score+FM Z-score                           | <b>-0.11+0.03<sup>***</sup></b>  | <b>-0.12+0.04<sup>***</sup></b>  | <b>-0.12+0.04<sup>**</sup></b>  | -0.04+0.04                    | -0.06+0.04              | 0.00+0.04                     |
| <b>Log-transformed Leptin Z-score as the predictor</b>      |                                  |                                  |                                 |                               |                         |                               |
| Basic model <sup>a</sup>                                    | 0.10+0.04 <sup>**</sup>          | 0.02+0.04                        | 0.05+0.04                       | 0.13+0.05 <sup>**</sup>       | 0.10+0.04 <sup>*</sup>  | 0.08+0.05                     |
| Basic model+ LM Z-score                                     | <b>0.09+0.03<sup>**</sup></b>    | 0.02+0.04                        | 0.05+0.04                       | 0.05+0.05                     | 0.05+0.04               | 0.01+0.05                     |
| Basic model+BW Z-score                                      | <b>-0.10+0.04<sup>**</sup></b>   | <b>-0.12+0.04<sup>**</sup></b>   | <b>-0.10+0.04<sup>*</sup></b>   | <b>-0.10+0.05<sup>*</sup></b> | -0.06+0.05              | <b>-0.10+0.05<sup>#</sup></b> |
| Basic model+BMI Z-score                                     | <b>-0.09+0.04<sup>*</sup></b>    | <b>-0.12+0.04<sup>**</sup></b>   | <b>-0.10+0.04<sup>*</sup></b>   | <b>-0.11+0.05<sup>*</sup></b> | -0.07+0.05              | <b>-0.10+0.05<sup>#</sup></b> |
| Basic model+LM Z-score+FM Z-score                           | -0.01+0.04                       | -0.06+0.04                       | -0.01+0.04                      | -0.05+0.05                    | -0.04+0.05              | 0.05+0.05                     |

Beta (parameter estimate) ±SE was shown in the Table.

LM: whole-body Lean mass; FM: whole-body fat mass; BW: body weight; BMI: body mass index;

WB-BMC: whole-body less head bone mineral density (BMD); L2L4-BMD: Lumbar-spine BMD; TH-BMD: total-hip BMD;

<sup>a</sup> Basic model adjusted for age, Tanner stage, height Z-score, menarche status (no menarche/menarche at ≤13 years/ menarche at 14 years / menarche at ≥15 years), physical activity, active or passive smoking (yes/no), and student/non-student.

<sup>b</sup>The corresponding Z score of BMD was applied as the outcome

<sup>#</sup> p<0.08; \* p<0.05; \*\* p<0.01, \*\*\* p<0.001, \*\*\*\* p<0.0001

**Supplemental Table S5 Model-fitting results for the univariate models of each trait in Chinese twin pairs aged 13-21 years.**

| Models <sup>a</sup> | Adiponectin          |                      | Leptin              |                      | TH-BMC               |                      |
|---------------------|----------------------|----------------------|---------------------|----------------------|----------------------|----------------------|
|                     | $\Delta\chi^2$       | $\Delta\text{AIC}^b$ | $\Delta\chi^2$      | $\Delta\text{AIC}^b$ | $\chi^2$             | $\Delta\text{AIC}^b$ |
| <b>Males</b>        |                      |                      |                     |                      |                      |                      |
| ACE model           |                      |                      | The reference model |                      |                      |                      |
| AE model            | 13.14 <sup>***</sup> | 11.14                | <b>1.52</b>         | <b>-0.48</b>         | <b>0.51</b>          | <b>-1.49</b>         |
| CE model            | 2.14                 | 0.14                 | 2.08                | 0.08                 | 38.13 <sup>***</sup> | 36.13                |
| <b>Females</b>      |                      |                      |                     |                      |                      |                      |
| ACE model           |                      |                      | The reference model |                      |                      |                      |
| AE model            | 3.01                 | 1.01                 | <b>0.65</b>         | <b>-1.35</b>         | <b>0.00</b>          | <b>-2.00</b>         |
| CE model            | 10.54 <sup>**</sup>  | 8.54                 | 2.14                | 0.14                 | 50.20 <sup>***</sup> | 48.20                |

**TH-BMC:** total-hip bone mineral content.

<sup>a</sup>**ACE model:** allowing for an additive genetic component( $a^2$ ), shared ( $c^2$ ) and unique ( $e^2$ ) environmental components; **AE model:** the shared environmental component( $c^2$ ) was set to zero; **CE model:** the additive genetic component ( $a^2$ ) was set to zero.

<sup>b</sup>The best-fitted model (in bold) was the one not having a significant worse fit compared with the full ACE model (chi-square test is not statistically significant with p-value > 0.05) and with the lowest Akaike Information Criteria (AIC).

\*\*p<0.01, \*\*\*p<0.001

**Supplemental Figure S1. Plots of adipokines and bone phenotypes against age of menarche in 509 Chinese post-menarche females aged 13-21 years.**

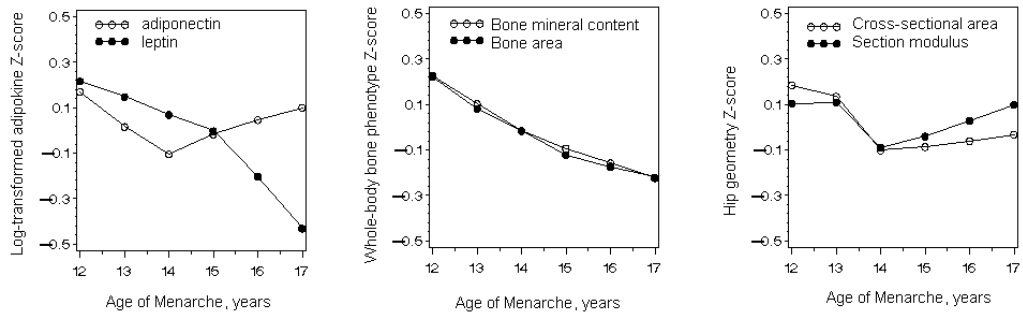

Supplement: jc.2009-1726_1.pdf [file jc.2009-1726_1.pdf]
